# Supplementary material
Source: PubMed Central journal article supplement (PMC7273311)
Supplement: jamaoncol-6-1011-s001.pdf [file jamaoncol-6-1011-s001.pdf]

## Supplementary Online Content

Ghosh N, Ahmed S, Ahn KW, et al. Association of reduced-intensity conditioning regimens with overall survival among patients with non-Hodgkin lymphoma undergoing allogeneic transplant. *JAMA Oncol*. Published online June 4, 2020.  
doi:10.1001/jamaoncol.2020.1278

**eTable 1.** Variables Tested in Cox Proportional Hazards Regression Model for NHL

**eTable 2.** Baseline Characteristics of NHL Patients Receiving RIC/NMA Conditioning Regimens Followed by allo-HCT

**eTable 3.** Adjusted Risk of GVHD, NRM, and Progression/Relapse, by Conditioning Regimen

**eTable 4.** Propensity Score Matching Results

**eTable 5.** Subset Analysis Results by Conditioning Regimen

**eTable 6.** Causes of Death

**eTable 7.** CIBMTR Data Collection Forms

This supplementary material has been provided by the authors to give readers additional information about their work.

**eTable 1.** Variables Tested in Cox Proportional Hazards Regression Model for NHL

|                                                                                                                                                                                                                                                                                                                                                                                                                                                                                                                                                                                                                                                                                                                                                                                                                                                                                                                                                                                                                                                                                                                                                                                                                                                                                                                                                                                                                                                                                                                  |
|------------------------------------------------------------------------------------------------------------------------------------------------------------------------------------------------------------------------------------------------------------------------------------------------------------------------------------------------------------------------------------------------------------------------------------------------------------------------------------------------------------------------------------------------------------------------------------------------------------------------------------------------------------------------------------------------------------------------------------------------------------------------------------------------------------------------------------------------------------------------------------------------------------------------------------------------------------------------------------------------------------------------------------------------------------------------------------------------------------------------------------------------------------------------------------------------------------------------------------------------------------------------------------------------------------------------------------------------------------------------------------------------------------------------------------------------------------------------------------------------------------------|
| <p>Main effect:</p> <ul style="list-style-type: none"><li>• Flu/Bu vs. Flu/Cy/2GyTBI vs. Flu/Mel140 vs. Flu/Cy</li></ul> <p>Patient-related variables:</p> <ul style="list-style-type: none"><li>• Age at transplant: continuous &amp; by age group: decades</li><li>• Patient sex: male vs. female</li><li>• Karnofsky performance status at transplant: <math>\geq 90</math> vs. <math>&lt; 90</math> vs. missing</li><li>• HCT-CI at transplant: 0 vs 1-2 vs <math>\geq 3</math> vs. missing</li><li>• Race: White vs. others vs. not reported</li></ul> <p>Disease-related variables:</p> <ul style="list-style-type: none"><li>• Histology: FL vs. DLBCL vs. MCL vs. other B cell vs. T cell</li><li>• Remission status at HCT: CR vs PR vs. resistant vs. untreated/unknown vs. missing</li><li>• History of autologous transplant: no vs. yes</li><li>• Time from diagnosis to HCT: <math>\geq 12</math> months vs. <math>&lt; 12</math> months</li></ul> <p>Transplant-related variables:</p> <ul style="list-style-type: none"><li>• Transplant donor type: matched related donor vs. matched unrelated donor</li><li>• GVHD prophylaxis: CNI + MTX <math>\pm</math> others except MMF vs. CNI + MMF <math>\pm</math> others vs. CNI + others except MMF, MTX</li><li>• ATG/Alemtuzumab use in conditioning: no vs. yes</li><li>• Rituximab in conditioning: no vs. yes vs. missing</li><li>• Donor-recipient CMV status: -/+ vs. others vs. missing</li><li>• Year of transplant: continuous</li></ul> |
|------------------------------------------------------------------------------------------------------------------------------------------------------------------------------------------------------------------------------------------------------------------------------------------------------------------------------------------------------------------------------------------------------------------------------------------------------------------------------------------------------------------------------------------------------------------------------------------------------------------------------------------------------------------------------------------------------------------------------------------------------------------------------------------------------------------------------------------------------------------------------------------------------------------------------------------------------------------------------------------------------------------------------------------------------------------------------------------------------------------------------------------------------------------------------------------------------------------------------------------------------------------------------------------------------------------------------------------------------------------------------------------------------------------------------------------------------------------------------------------------------------------|

Abbreviations: ATG, anti-thymocyte globulin; Bu, busulfan; CMV, cytomegalovirus; CNI, calcineurin inhibitor; CR, complete remission; Cy, cyclophosphamide; DLBCL, diffuse large B-cell lymphoma; FL, follicular lymphoma; Flu, fludarabine; GVHD, graft-versus-host disease; HCT, hematopoietic cell transplantation; HCT-CI, Hematopoietic Cell Transplantation Comorbidity Index; MCL, mantle cell lymphoma; Mel, melphalan; MMF, Mycophenolate mofetil; MTX, methotrexate; NHL, non-Hodgkin lymphoma; PR, partial remission; RIC/NMA, reduced-intensity conditioning/non-myeloablative; TBI, total body irradiation.

**eTable 2.** Baseline Characteristics of NHL Patients Receiving RIC/NMA Conditioning Regimens Followed by alloHCT

|                                                           | Flu/Bu     | Flu/Cy/<br>2GyTBI | Flu/Mel140  | Flu/Cy     | P<br>valu<br>e |
|-----------------------------------------------------------|------------|-------------------|-------------|------------|----------------|
| <b>Number of patients</b>                                 | 458        | 89                | 885         | 391        |                |
| Median patient age, years (range)                         | 58 (23-75) | 57 (29-74)        | 20-76)      | 56 (19-76) | <<br>0.001     |
| > 60                                                      | 187 (41)   | 34 (38)           | 282 (32)    | 123 (32)   |                |
| <b>Male sex</b>                                           | 291 (64)   | 61 (69)           | 566 (64)    | 268 (69)   | 0.32           |
| <b>Karnofsky performance score ≥ 90</b>                   | 260 (57)   | 58 (65)           | 549 (62)    | 265 (68)   | <<br>0.001     |
| Not reported                                              | 2 (<1)     | 4 (4)             | 20 (2)      | 24 (6)     |                |
| <b>HCT-CI</b>                                             |            |                   |             |            | <<br>0.001     |
| 0                                                         | 107 (23)   | 46 (52)           | 323 (36)    | 143 (37)   |                |
| 1-2                                                       | 142 (31)   | 20 (22)           | 246 (28)    | 112 (29)   |                |
| ≥ 3                                                       | 207 (45)   | 19 (21)           | 293 (33)    | 98 (25)    |                |
| Not reported                                              | 2 (<1)     | 4 (4)             | 23 (3)      | 38 (10)    |                |
| <b>Patient race</b>                                       |            |                   |             |            | <<br>0.001     |
| White                                                     | 429 (94)   | 80 (90)           | 736 (83)    | 329 (84)   |                |
| Other                                                     | 29 (6)     | 9 (10)            | 145 (16)    | 61 (16)    |                |
| Not reported                                              | 0          | 0                 | 4 (<1)      | 1 (<1)     |                |
| <b>Donor type</b>                                         |            |                   |             |            | 0.003          |
| Matched related donor                                     | 219 (48)   | 45 (51)           | 456 (52)    | 236 (60)   |                |
| Matched unrelated donor                                   | 239 (52)   | 44 (49)           | 429 (48)    | 155 (40)   |                |
| <b>Lymphoma subtype</b>                                   |            |                   |             |            | <<br>0.001     |
| Follicular lymphoma                                       | 95 (21)    | 32 (36)           | 152 (17)    | 138 (35)   |                |
| Diffuse large B-cell lymphoma                             | 151 (33)   | 17 (19)           | 296 (33)    | 78 (20)    |                |
| Mantle cell lymphoma                                      | 81 (18)    | 15 (17)           | 132 (15)    | 116 (30)   |                |
| Other B-cell lymphoma                                     | 20 (4)     | 9 (10)            | 44 (5)      | 19 (5)     |                |
| T-cell NHL                                                | 111 (24)   | 16 (18)           | 261 (29)    | 40 (10)    |                |
| <b>Remission at HCT</b>                                   |            |                   |             |            | 0.09           |
| Complete remission                                        | 202 (44)   | 50 (56)           | 364 (41)    | 162 (41)   |                |
| Partial remission                                         | 190 (41)   | 33 (37)           | 379 (43)    | 162 (41)   |                |
| Resistant                                                 | 53 (12)    | 6 (7)             | 125 (14)    | 57 (15)    |                |
| Untreated/Not reported                                    | 13 (3)     | 0                 | 17 (2)      | 10 (3)     |                |
| <b>History of prior autoHCT</b>                           | 179 (39)   | 32 (36)           | 326 (37)    | 133 (34)   | 0.5            |
| <b>Median time from diagnosis to HCT, months (range)</b>  | 33 (3-340) | 46 (3-236)        | 29 (<2-460) | 38 (2-310) | 0.001          |
| <b>GVHD prophylaxis</b>                                   |            |                   |             |            | 0.001          |
| CNI + MMF +/- other(s)                                    | 117 (26)   | 23 (26)           | 100 (11)    | 68 (17)    |                |
| CNI + MTX +/- other(s)                                    | 307 (67)   | 61 (69)           | 494 (56)    | 249 (64)   |                |
| CNI + other(s)                                            | 34 (7)     | 5 (6)             | 291 (33)    | 74 (19)    |                |
| <b>ATG/alemtuzumab in conditioning</b>                    | 159 (35)   | 47 (53)           | 269 (30)    | 81 (21)    | 0.001          |
| <b>Rituximab use in conditioning</b>                      | 7 (2)      | 35 (39)           | 80 (9)      | 199 (51)   | 0.001          |
| <b>CMV status</b> = Donor negative/<br>Recipient positive | 113 (25)   | 15 (17)           | 222 (25)    | 88 (23)    | 0.04           |
| <b>Year of HCT</b>                                        |            |                   |             |            |                |
| 2008-2010                                                 | 120 (26)   | 45 (51)           | 216 (24)    | 166 (42)   |                |
| 2011-2013                                                 | 168 (37)   | 35 (39)           | 320 (36)    | 144 (37)   |                |

|                                                      |            |            |            |            |  |
|------------------------------------------------------|------------|------------|------------|------------|--|
| 2014-2016                                            | 170 (37)   | 9 (10)     | 349 (39)   | 81 (21)    |  |
| <b>Median follow-up of survivors, months (range)</b> | 48 (3-101) | 71 (9-103) | 47 (2-117) | 60 (3-115) |  |

Abbreviations: allo, allogeneic; auto, autologous; ATG, anti-thymocyte globulin; Bu, busulfan; CNI, calcineurin inhibitor; Cy, cyclophosphamide; Flu, fludarabine; GVHD, graft-versus-host disease; HCT, hematopoietic cell transplantation; HCT-CI, Hematopoietic Cell Transplantation Comorbidity Index; Mel, melphalan; MMF, Mycophenolate mofetil; MTX, methotrexate; NHL, non-Hodgkin lymphoma; RIC/NMA, reduced-intensity conditioning/non-myeloablative; TBI, total body irradiation.

**eTable 1.** Adjusted Risk of GVHD, NRM, and Progression/Relapse, by Conditioning Regimen

|                                              | <b>N</b> | <b>OR (95% CI)</b> | <b>P value</b>                | <b>Q value</b> |
|----------------------------------------------|----------|--------------------|-------------------------------|----------------|
| <b>Grade 3-4 acute GVHD<sup>a</sup></b>      |          |                    |                               |                |
| Flu/Bu                                       | 432      | 1                  | <b>0.15<sup>b</sup></b>       |                |
| Flu/Cy/2GyTBI                                | 78       | 0.81 (0.37-1.77)   | 0.59                          | 1              |
| Flu/Mel140                                   | 832      | 1.42 (0.99-2.02)   | 0.05                          | 0.74           |
| Flu/Cy                                       | 378      | 1.34 (0.9-2.01)    | 0.15                          | 0.74           |
| Contrast                                     |          |                    |                               |                |
| Flu/Cy/2GyTBI vs Flu/Mel140                  |          | 0.57 (0.27-1.22)   | 0.15                          | 0.74           |
| Flu/Cy/2GyTBI vs Flu/Cy                      |          | 0.60 (0.27-1.32)   | 0.21                          | 0.77           |
| Flu/Mel140 vs Flu/Cy                         |          | 1.06 (0.75-1.49)   | 0.76                          | 1.00           |
| <b>Chronic GVHD<sup>c</sup></b>              |          |                    |                               |                |
| Flu/Bu                                       | 437      | 1                  | <b>0.006<sup>b</sup></b>      |                |
| Flu/Cy/2GyTBI                                | 84       | 0.96 (0.68-1.34)   | 0.79                          | 1              |
| Flu/Mel140                                   | 827      | 1.12 (0.94-1.33)   | 0.21                          | 1              |
| Flu/Cy                                       | 377      | 0.81(0.67-0.99)    | 0.04                          | 0.29           |
| Contrast                                     |          |                    |                               |                |
| Flu/Cy/2GyTBI vs Flu/Mel140                  |          | 0.85 (0.61-1.19)   | 0.35                          | 1              |
| Flu/Cy/2GyTBI vs Flu/Cy                      |          | 1.18 (0.83-1.67)   | 0.35                          | 1              |
| Flu/Mel140 vs Flu/Cy                         |          | 1.38 (1.15-1.65)   | < 0.001                       | 0.006          |
| <b>Non-relapse mortality<sup>d</sup></b>     |          |                    |                               |                |
| Flu/Bu                                       | 457      | 1                  | <b>&lt; 0.001<sup>b</sup></b> |                |
| Flu/Cy/2GyTBI                                | 89       | 0.75 (0.43-1.31)   | 0.31                          | 0.97           |
| Flu/Mel140                                   | 879      | 1.78 (1.37-2.31)   | < 0.001                       | < 0.001        |
| Flu/Cy                                       | 389      | 1.00 (0.7-1.42)    | 0.99                          | 1              |
| Contrast                                     |          |                    |                               |                |
| Flu/Cy/2GyTBI vs Flu/Mel140                  |          | 0.42 (0.25-0.72)   | 0.001                         | 0.005          |
| Flu/Cy/2GyTBI vs Flu/Cy                      |          | 0.75 (0.42-1.34)   | 0.33                          | 0.97           |
| Flu/Mel140 vs Flu/Cy                         |          | 1.79 (1.33-2.39)   | < 0.001                       | < 0.001        |
| <b>Progression/relapse<sup>e</sup></b>       |          |                    |                               |                |
| Flu/Bu                                       | 458      | 1                  | <b>0.001<sup>b</sup></b>      |                |
| Flu/Cy/2GyTBI                                | 89       | 0.65 (0.44-0.97)   | 0.04                          | 0.15           |
| Flu/Mel140                                   | 885      | 0.79 (0.66-0.94)   | 0.007                         | 0.07           |
| Flu/Cy                                       | 391      | 1.08 (0.88-1.33)   | 0.48                          | 1              |
| Contrast                                     |          |                    |                               |                |
| Flu/Cy/2GyTBI vs Flu/Mel140                  |          | 0.83 (0.56-1.23)   | 0.36                          | 1              |
| Flu/Cy/2GyTBI vs Flu/Cy                      |          | 0.61 (0.40-0.91)   | 0.02                          | 0.10           |
| Flu/Mel140 vs Flu/Cy                         |          | 0.73 (0.60-0.88)   | 0.001                         | 0.01           |
| <b>Progression-free survival<sup>f</sup></b> |          |                    |                               |                |
| Flu/Bu                                       | 458      | 1                  | <b>0.09<sup>b</sup></b>       |                |
| Flu/Cy/2GyTBI                                | 89       | 0.70 (0.51-0.98)   | 0.04                          | 0.2            |
| Flu/Mel140                                   | 885      | 1.03 (0.89-1.19)   | 0.71                          | 1              |
| Flu/Cy                                       | 391      | 1.07 (0.89-1.29)   | 0.46                          | 1              |
| Contrast                                     |          |                    |                               |                |
| Flu/Cy/2GyTBI vs Flu/Mel140                  |          | 0.68 (0.50-0.94)   | 0.02                          | 0.15           |
| Flu/Cy/2GyTBI vs Flu/Cy                      |          | 0.66 (0.47-0.91)   | 0.01                          | 0.15           |
| Flu/Mel140 vs Flu/Cy                         |          | 0.96 (0.81-1.13)   | 0.61                          | 1              |

(continued on next page)

| <b>Overall Survival</b> <sup>g</sup> |     | <b>HR (95% CI)</b> |                                |         |
|--------------------------------------|-----|--------------------|--------------------------------|---------|
| Flu/Bu                               | 458 | 1                  | <b>&lt; 0.001</b> <sup>b</sup> |         |
| Flu/Cy/2GyTBI                        | 89  | 0.72 (0.49-1.06)   | 0.10                           | 0.37    |
| Flu/Mel140                           | 885 | 1.34 (1.13-1.59)   | < 0.001                        | < 0.001 |
| Flu/Cy                               | 391 | 0.88 (0.7-1.11)    | 0.27                           | 0.79    |
| <b>Contrast</b>                      |     |                    |                                |         |
| Flu/Cy/2GyTBI vs Flu/Mel140          |     | 0.54 (0.37-0.78)   | 0.001                          | 0.0049  |
| Flu/Cy/2GyTBI vs Flu/Cy              |     | 0.82 (0.55-1.23)   | 0.33                           | 0.81    |
| Flu/Mel140 vs Flu/Cy                 |     | 1.53 (1.25-1.87)   | < 0.001                        | < 0.001 |

Abbreviations: Bu, Busulfan; CI, confidence interval; Cy, cyclophosphamide; Flu, fludarabine; GVHD, graft-versus-host disease; HR, hazard ratio; Mel, Melphalan; TBI, total body irradiation.

<sup>a</sup> Grade 3-4 acute GVHD adjusted for GVHD prophylaxis.

<sup>b</sup> Overall P values show whether the main effect was significant based on the Wald test in the final model. The other P values are from pairwise comparisons between two conditioning regimens. For each outcome, the first 3 P values show the P values from pairwise comparisons against the reference group (Flu/Bu). The 3 P values in the contrast are from the pairwise comparisons as stated. All pairwise comparisons were from the Wald test.

<sup>c</sup> Chronic GVHD adjusted for donor type, GVHD prophylaxis, ATG/alemtuzumab use in conditioning.

<sup>d</sup> NRM adjusted for age, KPS, HCT-CI, prior autoHCT, and ATG/alemtuzumab use in conditioning.

<sup>e</sup> Progression/relapse adjusted for remission at HCT, NHL subtype, donor type, ATG/alemtuzumab use in conditioning.

<sup>f</sup> Progression free survival adjusted for KPS, NHL subtype, remission at HCT, ATG/alemtuzumab use in conditioning.

<sup>g</sup> Overall survival adjusted for patient age, KPS, HCT-CI, NHL subtype, remission status at HCT, and ATG/alemtuzumab use in conditioning.

**eTable 4. Propensity Score Matching Results**

|                                               | <b>N</b> | <b>HR (95% CI)</b> | <b>P value</b>       | <b>Q value</b> |
|-----------------------------------------------|----------|--------------------|----------------------|----------------|
| <b>Non-relapse mortality</b>                  |          |                    |                      |                |
| Conditioning regimen <sup>a</sup>             |          |                    |                      |                |
| Flu/Bu                                        | 415      | 1                  | < 0.001 <sup>b</sup> |                |
| Flu/Cy/2GyTBI                                 | 88       | 0.75 (0.42-1.35)   | 0.35                 | 1              |
| Flu/ Mel140                                   | 587      | 1.91 (1.48-2.46)   | < 0.001              | < 0.001        |
| Flu/Cy                                        | 376      | 1.02 (0.73-1.42)   | 0.90                 | 1              |
| Contrast                                      |          |                    |                      |                |
| Flu/Cy/2GyTBI vs Flu/Mel140                   |          | 0.40 (0.23-0.68)   | < 0.001              | 0.004          |
| Flu/Cy/2GyTBI vs Flu/Cy                       |          | 0.74 (0.40-1.37)   | 0.34                 | 1              |
| Flu/Mel140 vs Flu/Cy                          |          | 1.87 (1.42-2.46)   | < 0.001              | < 0.001        |
| <b>Progression/relapse <sup>c</sup></b>       |          |                    |                      |                |
| Conditioning regimen <sup>d</sup>             |          |                    |                      |                |
| Flu/Bu                                        | 415      | 1                  | 0.003 <sup>b</sup>   |                |
| Flu/Cy/2GyTBI                                 | 88       | 0.66 (0.42-1.03)   | 0.07                 | 0.26           |
| Flu/ Mel140                                   | 587      | 0.82 (0.69-0.97)   | 0.02                 | 0.15           |
| Flu/Cy                                        | 376      | 1.09 (0.87-1.37)   | 0.45                 | 1              |
| Contrast                                      |          |                    |                      |                |
| Flu/Cy/2GyTBI vs Flu/Mel140                   |          | 0.81 (0.52-1.24)   | 0.33                 | 0.97           |
| Flu/Cy/2GyTBI vs Flu/Cy                       |          | 0.60 (0.39-0.94)   | 0.03                 | 0.15           |
| Flu/Mel140 vs Flu/Cy                          |          | 0.75 (0.62-0.91)   | 0.003                | 0.04           |
| <b>Progression-free survival <sup>e</sup></b> |          |                    |                      |                |
| Conditioning regimen <sup>f</sup>             |          |                    |                      |                |
| Flu/Bu                                        | 415      | 1                  | 0.06 <sup>b</sup>    |                |
| Flu/Cy/2GyTBI                                 | 88       | 0.68 (0.48-0.97)   | 0.03                 | 0.15           |
| Flu/ Mel140                                   | 587      | 1.07 (0.93-1.24)   | 0.35                 | 1              |
| Flu/Cy                                        | 376      | 1.05 (0.89-1.25)   | 0.55                 | 1              |
| Contrast                                      |          |                    |                      |                |
| Flu/Cy/2GyTBI vs Flu/Mel140                   |          | 0.63 (0.45-0.89)   | 0.01                 | 0.15           |
| Flu/Cy/2GyTBI vs Flu/Cy                       |          | 0.64 (0.45-0.93)   | 0.02                 | 0.15           |
| Flu/Mel140 vs Flu/Cy                          |          | 1.02 (0.86-1.99)   | 0.85                 | 1              |
| <b>Overall survival <sup>g</sup></b>          |          |                    |                      |                |
| Conditioning regimen <sup>h</sup>             |          |                    |                      |                |
| Flu/Bu                                        | 416      | 1                  | < 0.001 <sup>b</sup> |                |
| Flu/Cy/2GyTBI                                 | 88       | 0.79 (0.52-1.18)   | 0.25                 | 0.92           |
| Flu/ Mel140                                   | 587      | 1.43 (1.20-1.71)   | < 0.001              | < 0.001        |
| Flu/Cy                                        | 376      | 0.90 (0.72-1.13)   | 0.36                 | 1              |
| Contrast                                      |          |                    |                      |                |
| Flu/Cy/2GyTBI vs Flu/Mel140                   |          | 0.55 (0.37-0.81)   | 0.003                | 0.014          |
| Flu/Cy/2GyTBI vs Flu/Cy                       |          | 0.87 (0.58-1.31)   | 0.51                 | 1              |
| Flu/Mel140 vs Flu/Cy                          |          | 1.59 (1.29-1.95)   | < 0.001              | < 0.001        |

Abbreviations: Bu, Busulfan; CI, confidence interval; Cy, cyclophosphamide; Flu, fludarabine; GVHD, graft-versus-host disease; HR, hazard ratio; Mel, Melphalan; TBI, total body irradiation

<sup>a</sup> Non-relapse mortality adjusted for significant covariates: patient age, KPS, HCT-CI, prior autoHCT, ATG/alemtuzumab use in conditioning

<sup>b</sup> Overall *P* values showing whether the main effect was significant based on the Wald test in the final model. The other *P* values are from pairwise comparisons between two conditioning regimens. For each outcome, the first 3 *P* values show the *P* values from pairwise comparisons against the reference group (Flu/Bu). The 3 *P* values in the contrast are from the pairwise comparisons as stated. All pairwise comparisons were from the Wald test.

<sup>c</sup> Progression/relapse adjusted for significant covariates: remission status at HCT, NHL histology, donor type, ATG/alemtuzumab use in conditioning

<sup>d</sup> Non-relapse mortality adjusted for significant covariates: patient age, KPS, HCT-CI, prior autoHCT, ATG/alemtuzumab use in conditioning

<sup>e</sup> Progression free survival adjusted for significant covariates: KPS, NHL histology, remission status at HCT, ATG/alemtuzumab use in conditioning

<sup>f</sup> Non-relapse mortality adjusted for significant covariates: patient age, KPS, HCT-CI, prior autoHCT, ATG/alemtuzumab use in conditioning

<sup>g</sup> Overall survival adjusted for significant covariates: patient age, KPS, HCT-CI, NHL histology, remission status at HCT, ATG/alemtuzumab use in conditioning

<sup>h</sup> Non-relapse mortality adjusted for significant covariates: patient age, KPS, HCT-CI, prior autoHCT, ATG/alemtuzumab use in conditioning.



**eTable 5. Subset Analysis Results by Conditioning Regimen**

|                                              | <b>N</b> | <b>HR</b> | <b>HR Lower CI</b> | <b>HR Upper CI</b> | <b>P value</b> |
|----------------------------------------------|----------|-----------|--------------------|--------------------|----------------|
| <b>Non-relapse mortality<sup>a</sup></b>     |          |           |                    |                    |                |
| Flu/Bu                                       | 415      | 1         |                    |                    |                |
| Flu/Mel140                                   | 587      | 1.88      | 1.47               | 2.41               | <0.001         |
| <b>Progression/relapse<sup>b</sup></b>       |          |           |                    |                    |                |
| Flu/Bu                                       | 415      | 1         |                    |                    |                |
| Flu/Mel140                                   | 587      | 0.82      | 0.69               | 0.97               | 0.02           |
| <b>Progression-free survival<sup>c</sup></b> |          |           |                    |                    |                |
| Flu/Bu                                       | 415      | 1         |                    |                    |                |
| Flu/Mel140                                   | 587      | 1.07      | 0.93               | 1.24               | 0.34           |
| <b>Overall survival<sup>d</sup></b>          |          |           |                    |                    |                |
| Flu/Bu                                       | 416      | 1         |                    |                    |                |
| Flu/Mel140                                   | 587      | 1.42      | 1.19               | 1.69               | <0.001         |

Note: The *P* values are from a pairwise comparison between Flu/Bu and Flu/Mel140 based on the Wald test.

<sup>a</sup> Non-relapse mortality adjusted for significant covariates: patient age, KPS, HCT-CI, prior autoHCT, ATG/alemtuzumab use in conditioning

<sup>b</sup> Progression/relapse adjusted for significant covariates: remission status at HCT, NHL histology, donor type, ATG/alemtuzumab use in conditioning

<sup>c</sup> Progression-free survival adjusted for significant covariates: KPS, NHL histology, remission status at HCT, ATG/alemtuzumab use in conditioning

<sup>d</sup> Overall survival adjusted for significant covariates: patient age, KPS, HCT-CI, NHL histology, remission status at HCT, ATG/alemtuzumab use in conditioning.

**eTable 6. Causes of Death**

|                           | <b>Flu/Bu</b> | <b>Flu/Cy/2GyTBI</b> | <b>Flu/Mel140</b> | <b>Flu/Cy</b> |
|---------------------------|---------------|----------------------|-------------------|---------------|
| <b>Number of patients</b> | <b>194</b>    | <b>30</b>            | <b>428</b>        | <b>143</b>    |
| Cause of death, No. (%)   |               |                      |                   |               |
| Primary disease           | 103 (53)      | 11 (37)              | 164 (38)          | 60 (42)       |
| Graft-versus-host disease | 28 (14)       | 6 (20)               | 46 (11)           | 13 (9)        |
| Infection                 | 22 (11)       | 3 (10)               | 73 (17)           | 18 (13)       |
| Organ failure             | 11 (6)        | 3 (10)               | 47 (11)           | 19 (13)       |
| Secondary malignancy      | 4 (2)         | 1 (3)                | 12 (3)            | 4 (3)         |
| Graft failure             | 3 (2)         | 1 (3)                | 31 (7)            | 2 (1)         |
| IPS/ARDS                  | 2 (1)         | 0                    | 2 (<1)            | 3 (2)         |
| Organ toxicity            | 0             | 0                    | 1 (<1)            | 0             |
| Vascular                  | 0             | 0                    | 5 (1)             | 2 (1)         |
| Other causes <sup>a</sup> | 16 (8)        | 3 (10)               | 35 (8)            | 18 (13)       |
| Unknown                   | 5 (3)         | 2 (7)                | 12 (3)            | 4 (3)         |

Abbreviations: IPn, idiopathic pneumonia syndrome; ARDS, acute respiratory distress syndrome

<sup>a</sup> Other causes: **Flu/Bu**: 14 other HCT-related cause, not otherwise specified (NOS); 1 colon perforation; 1 sudden death. **Flu/Cy/2GyTBI**: 3 other HCT-related cause, NOS. **Flu/Mel140**: 29 other HCT-related cause, NOS; 1 accidental death; 1 complication from gallbladder surgery; 1 suicide; 1 large volume hemoptysis following NGT placement; 1 respiratory distress not related to HCT; 1 sudden death. **Flu/Cy**: 15 other HCT-related cause, NOS; 1 accidental overdose; 1 broken femur; 1 motor vehicle accident.

**eTable 7. CIBMTR Data Collection Forms**

| <b>Form</b>                           | <b>Revision</b> | <b>Link</b>                                                                                                                                                                                                                     |
|---------------------------------------|-----------------|---------------------------------------------------------------------------------------------------------------------------------------------------------------------------------------------------------------------------------|
| Pre-Transplant Essential Data         | Active          | <a href="https://www.cibmtr.org/DataManagement/DataCollectionForms/Documents/2402/Rev4.0/2402R4.pdf">https://www.cibmtr.org/DataManagement/DataCollectionForms/Documents/2402/Rev4.0/2402R4.pdf</a>                             |
| Pre-Transplant Essential Data         | 5               | <a href="https://www.cibmtr.org/DataManagement/DataCollectionForms/Documents/2400/Rev5.0/2400R5.0.pdf">https://www.cibmtr.org/DataManagement/DataCollectionForms/Documents/2400/Rev5.0/2400R5.0.pdf</a>                         |
| Pre-Transplant Essential Data         | 4               | <a href="https://www.cibmtr.org/DataManagement/DataCollectionForms/Documents/2400/Rev4.0/2400R4.0.pdf">https://www.cibmtr.org/DataManagement/DataCollectionForms/Documents/2400/Rev4.0/2400R4.0.pdf</a>                         |
| Pre-Transplant Essential Data         | 3               | <a href="https://www.cibmtr.org/DataManagement/DataCollectionForms/Pages/DataCollectionFormInfo.aspx?dcfid=357">https://www.cibmtr.org/DataManagement/DataCollectionForms/Pages/DataCollectionFormInfo.aspx?dcfid=357</a>       |
| Pre-Transplant Essential Data         | 2               | <a href="https://www.cibmtr.org/DataManagement/DataCollectionForms/Documents/2400/Rev2.0/Pre-TED-080409-r2.pdf">https://www.cibmtr.org/DataManagement/DataCollectionForms/Documents/2400/Rev2.0/Pre-TED-080409-r2.pdf</a>       |
| Pre-Transplant Essential Data         | 1               | <a href="https://www.cibmtr.org/DataManagement/DataCollectionForms/Documents/2400/Rev1.0/Pre-TED-1.pdf">https://www.cibmtr.org/DataManagement/DataCollectionForms/Documents/2400/Rev1.0/Pre-TED-1.pdf</a>                       |
| Pre-Transplant Disease Classification | Active          | <a href="https://www.cibmtr.org/DataManagement/DataCollectionForms/Documents/2402/Rev4.0/2402R4+.pdf">https://www.cibmtr.org/DataManagement/DataCollectionForms/Documents/2402/Rev4.0/2402R4+.pdf</a>                           |
| Pre-Transplant Disease Classification | 3               | <a href="https://www.cibmtr.org/DataManagement/DataCollectionForms/Documents/2400/Rev1.0/Pre-TED-1.pdf">https://www.cibmtr.org/DataManagement/DataCollectionForms/Documents/2400/Rev1.0/Pre-TED-1.pdf</a>                       |
| Pre-Transplant Disease Classification | 2               | <a href="https://www.cibmtr.org/DataManagement/DataCollectionForms/Documents/2402/Rev2.0/2402R2.0.pdf">https://www.cibmtr.org/DataManagement/DataCollectionForms/Documents/2402/Rev2.0/2402R2.0.pdf</a>                         |
| Pre-Transplant Disease Classification | 1               | <a href="https://www.cibmtr.org/DataManagement/DataCollectionForms/Documents/2402/Rev1.0/2402R1.0.pdf">https://www.cibmtr.org/DataManagement/DataCollectionForms/Documents/2402/Rev1.0/2402R1.0.pdf</a>                         |
| Post-Transplant Essential Data        | Active          | <a href="https://www.cibmtr.org/DataManagement/DataCollectionForms/Documents/2450/Rev5.0/2450R5+.pdf">https://www.cibmtr.org/DataManagement/DataCollectionForms/Documents/2450/Rev5.0/2450R5+.pdf</a>                           |
| Post-Transplant Essential Data        | 4               | <a href="https://www.cibmtr.org/DataManagement/DataCollectionForms/Documents/2450/Rev4.0/2450R4.0.pdf">https://www.cibmtr.org/DataManagement/DataCollectionForms/Documents/2450/Rev4.0/2450R4.0.pdf</a>                         |
| Post-Transplant Essential Data        | 3               | <a href="https://www.cibmtr.org/DataManagement/DataCollectionForms/Documents/2450/Rev3.0/2450R3.0.pdf">https://www.cibmtr.org/DataManagement/DataCollectionForms/Documents/2450/Rev3.0/2450R3.0.pdf</a>                         |
| Post-Transplant Essential Data        | 2               | <a href="https://www.cibmtr.org/DataManagement/DataCollectionForms/Documents/2450/Rev2.0/Post-TED-081009-r2x.pdf">https://www.cibmtr.org/DataManagement/DataCollectionForms/Documents/2450/Rev2.0/Post-TED-081009-r2x.pdf</a>   |
| Post-Transplant Essential Data        | 1               | <a href="https://www.cibmtr.org/DataManagement/DataCollectionForms/Documents/2450/Rev1.0/Post-TED-1.pdf">https://www.cibmtr.org/DataManagement/DataCollectionForms/Documents/2450/Rev1.0/Post-TED-1.pdf</a>                     |
| Confirmation of HLA Typing            | Active          | <a href="https://www.cibmtr.org/DataManagement/DataCollectionForms/Documents/2005/Rev7.0/2005R7.pdf">https://www.cibmtr.org/DataManagement/DataCollectionForms/Documents/2005/Rev7.0/2005R7.pdf</a>                             |
| Confirmation of HLA Typing            | 6               | <a href="https://www.cibmtr.org/DataManagement/DataCollectionForms/Documents/2005/Rev6.0/2005R6.0.pdf">https://www.cibmtr.org/DataManagement/DataCollectionForms/Documents/2005/Rev6.0/2005R6.0.pdf</a>                         |
| Confirmation of HLA Typing            | 5               | <a href="https://www.cibmtr.org/DataManagement/DataCollectionForms/Documents/2005/Rev5.0/2005R5.0.pdf">https://www.cibmtr.org/DataManagement/DataCollectionForms/Documents/2005/Rev5.0/2005R5.0.pdf</a>                         |
| Confirmation of HLA Typing            | 4               | <a href="https://www.cibmtr.org/DataManagement/DataCollectionForms/Documents/2005/Rev4.0/Form2005_R4_Retired.pdf">https://www.cibmtr.org/DataManagement/DataCollectionForms/Documents/2005/Rev4.0/Form2005_R4_Retired.pdf</a>   |
| Confirmation of HLA Typing            | 3               | <a href="https://www.cibmtr.org/DataManagement/DataCollectionForms/Documents/2005/Rev3.0/combine-2005_HLA_r3_.pdf">https://www.cibmtr.org/DataManagement/DataCollectionForms/Documents/2005/Rev3.0/combine-2005_HLA_r3_.pdf</a> |
| Confirmation of HLA Typing            | 2               | <a href="https://www.cibmtr.org/DataManagement/DataCollectionForms/Documents/2005/Rev2.0/combine-2005-HLA-r2.pdf">https://www.cibmtr.org/DataManagement/DataCollectionForms/Documents/2005/Rev2.0/combine-2005-HLA-r2.pdf</a>   |
| Confirmation of HLA Typing            | 1               | <a href="https://www.cibmtr.org/DataManagement/DataCollectionForms/Documents/2005/Rev1.0/combine_2005_HLA.pdf">https://www.cibmtr.org/DataManagement/DataCollectionForms/Documents/2005/Rev1.0/combine_2005_HLA.pdf</a>         |
| Infectious disease markers            | Active          | <a href="https://www.cibmtr.org/DataManagement/DataCollectionForms/Documents/2004/Rev5.0/2004R5+.pdf">https://www.cibmtr.org/DataManagement/DataCollectionForms/Documents/2004/Rev5.0/2004R5+.pdf</a>                           |
| Infectious disease markers            | 4               | <a href="https://www.cibmtr.org/DataManagement/DataCollectionForms/Documents/2004/Rev4.0/2004R4.0.pdf">https://www.cibmtr.org/DataManagement/DataCollectionForms/Documents/2004/Rev4.0/2004R4.0.pdf</a>                         |

|                                               |        |                                                                                                                                                                                                                                   |
|-----------------------------------------------|--------|-----------------------------------------------------------------------------------------------------------------------------------------------------------------------------------------------------------------------------------|
| Infectious disease markers                    | 3      | <a href="https://www.cibmtr.org/DataManagement/DataCollectionForms/Documents/2004/Rev3.0/Form2004_R3_Retired.pdf">https://www.cibmtr.org/DataManagement/DataCollectionForms/Documents/2004/Rev3.0/Form2004_R3_Retired.pdf</a>     |
| Infectious disease markers                    | 2      | <a href="https://www.cibmtr.org/DataManagement/DataCollectionForms/Documents/2004/Rev2.0/combine-2004-IDMs-r2.pdf">https://www.cibmtr.org/DataManagement/DataCollectionForms/Documents/2004/Rev2.0/combine-2004-IDMs-r2.pdf</a>   |
| Infectious disease markers                    | 1      | <a href="https://www.cibmtr.org/DataManagement/DataCollectionForms/Documents/2004/Rev1.0/combine_2004_IDMs.pdf">https://www.cibmtr.org/DataManagement/DataCollectionForms/Documents/2004/Rev1.0/combine_2004_IDMs.pdf</a>         |
| Hematopoietic Cellular Transplant Infusion    | Active | <a href="https://www.cibmtr.org/DataManagement/DataCollectionForms/Documents/2006/Rev5.0/2006R5+.pdf">https://www.cibmtr.org/DataManagement/DataCollectionForms/Documents/2006/Rev5.0/2006R5+.pdf</a>                             |
| Hematopoietic Cellular Transplant Infusion    | 4      | <a href="https://www.cibmtr.org/DataManagement/DataCollectionForms/Documents/2006/Rev4.0/2006R4.0.pdf">https://www.cibmtr.org/DataManagement/DataCollectionForms/Documents/2006/Rev4.0/2006R4.0.pdf</a>                           |
| Hematopoietic Cellular Transplant Infusion    | 3      | <a href="https://www.cibmtr.org/DataManagement/DataCollectionForms/Documents/2006/REV3.0/Form2006_R3_Retired.pdf">https://www.cibmtr.org/DataManagement/DataCollectionForms/Documents/2006/REV3.0/Form2006_R3_Retired.pdf</a>     |
| Hematopoietic Cellular Transplant Infusion    | 2      | <a href="https://www.cibmtr.org/DataManagement/DataCollectionForms/Documents/2006/Rev2.0/combine-2006-INF-r2.pdf">https://www.cibmtr.org/DataManagement/DataCollectionForms/Documents/2006/Rev2.0/combine-2006-INF-r2.pdf</a>     |
| Hematopoietic Cellular Transplant Infusion    | 1      | <a href="https://www.cibmtr.org/DataManagement/DataCollectionForms/Documents/2006/Rev1.0/combine_2006_INF.pdf">https://www.cibmtr.org/DataManagement/DataCollectionForms/Documents/2006/Rev1.0/combine_2006_INF.pdf</a>           |
| Recipient Baseline Data                       | Active | <a href="https://www.cibmtr.org/DataManagement/DataCollectionForms/Documents/2000/Rev5.0/2000R5.pdf">https://www.cibmtr.org/DataManagement/DataCollectionForms/Documents/2000/Rev5.0/2000R5.pdf</a>                               |
| Recipient Baseline Data                       | 4      | <a href="https://www.cibmtr.org/DataManagement/DataCollectionForms/Documents/2000/Rev4.0/2000R4.0+.pdf">https://www.cibmtr.org/DataManagement/DataCollectionForms/Documents/2000/Rev4.0/2000R4.0+.pdf</a>                         |
| Recipient Baseline Data                       | 3      | <a href="https://www.cibmtr.org/DataManagement/DataCollectionForms/Documents/2000/Rev3.0/Form2000_R3_Retired.pdf">https://www.cibmtr.org/DataManagement/DataCollectionForms/Documents/2000/Rev3.0/Form2000_R3_Retired.pdf</a>     |
| Recipient Baseline Data                       | 2      | <a href="https://www.cibmtr.org/DataManagement/DataCollectionForms/Documents/2000/Rev2.0/2000-Baseline-r2-rtrd.pdf">https://www.cibmtr.org/DataManagement/DataCollectionForms/Documents/2000/Rev2.0/2000-Baseline-r2-rtrd.pdf</a> |
| Recipient Baseline Data                       | 1      | <a href="https://www.cibmtr.org/DataManagement/DataCollectionForms/Documents/2000/Rev1.0/combine_2000_baselin.pdf">https://www.cibmtr.org/DataManagement/DataCollectionForms/Documents/2000/Rev1.0/combine_2000_baselin.pdf</a>   |
| Hodgkin and Non-Hodgkin Lymphoma Pre-HCT Data | Active | <a href="https://www.cibmtr.org/DataManagement/DataCollectionForms/Documents/2018/Rev5/2018R5.pdf">https://www.cibmtr.org/DataManagement/DataCollectionForms/Documents/2018/Rev5/2018R5.pdf</a>                                   |
| Hodgkin and Non-Hodgkin Lymphoma Pre-HCT Data | 4      | <a href="https://www.cibmtr.org/DataManagement/DataCollectionForms/Documents/2018/Rev4.0/2018R4.0.pdf">https://www.cibmtr.org/DataManagement/DataCollectionForms/Documents/2018/Rev4.0/2018R4.0.pdf</a>                           |
| Hodgkin and Non-Hodgkin Lymphoma Pre-HCT Data | 3      | <a href="https://www.cibmtr.org/DataManagement/DataCollectionForms/Documents/2018/Rev3.0/2018.R3.0.pdf">https://www.cibmtr.org/DataManagement/DataCollectionForms/Documents/2018/Rev3.0/2018.R3.0.pdf</a>                         |
| Hodgkin and Non-Hodgkin Lymphoma Pre-HCT Data | 2      | <a href="https://www.cibmtr.org/DataManagement/DataCollectionForms/Documents/2018/Rev2.0/Form2018_R2_Retired.pdf">https://www.cibmtr.org/DataManagement/DataCollectionForms/Documents/2018/Rev2.0/Form2018_R2_Retired.pdf</a>     |
| Hodgkin and Non-Hodgkin Lymphoma Pre-HCT Data | 1      | <a href="https://www.cibmtr.org/DataManagement/DataCollectionForms/Documents/2018/Rev1.0/combine_2018_LYM_201.pdf">https://www.cibmtr.org/DataManagement/DataCollectionForms/Documents/2018/Rev1.0/combine_2018_LYM_201.pdf</a>   |
| Post-HCT Data                                 | Active | <a href="https://www.cibmtr.org/DataManagement/DataCollectionForms/Documents/2100/Rev5.0/2100R5.0.pdf">https://www.cibmtr.org/DataManagement/DataCollectionForms/Documents/2100/Rev5.0/2100R5.0.pdf</a>                           |
| Post-HCT Data                                 | 4      | <a href="https://www.cibmtr.org/DataManagement/DataCollectionForms/Documents/2100/Rev4.0/2100R4.0.pdf">https://www.cibmtr.org/DataManagement/DataCollectionForms/Documents/2100/Rev4.0/2100R4.0.pdf</a>                           |
| Post-HCT Data                                 | 3      | <a href="https://www.cibmtr.org/DataManagement/DataCollectionForms/Documents/2100/Rev3.0/2100R3.0.pdf">https://www.cibmtr.org/DataManagement/DataCollectionForms/Documents/2100/Rev3.0/2100R3.0.pdf</a>                           |
| Post-HCT Data                                 | 2      | <a href="https://www.cibmtr.org/DataManagement/DataCollectionForms/Documents/2100/Rev2.0/combine-2100-Follow-.pdf">https://www.cibmtr.org/DataManagement/DataCollectionForms/Documents/2100/Rev2.0/combine-2100-Follow-.pdf</a>   |

|                                                     |        |                                                                                                                                                                                                                                     |
|-----------------------------------------------------|--------|-------------------------------------------------------------------------------------------------------------------------------------------------------------------------------------------------------------------------------------|
| Post-HCT Data                                       | 1      | <a href="https://www.cibmtr.org/DataManagement/DataCollectionForms/Documents/2100/Rev1.0/combine_2100_Follow_.pdf">https://www.cibmtr.org/DataManagement/DataCollectionForms/Documents/2100/Rev1.0/combine_2100_Follow_.pdf</a>     |
| Hodgkin and Non-Hodgkin Lymphoma Post-Infusion Data | Active | <a href="https://www.cibmtr.org/DataManagement/DataCollectionForms/Documents/2118/Rev4.0/2118R4.0.pdf">https://www.cibmtr.org/DataManagement/DataCollectionForms/Documents/2118/Rev4.0/2118R4.0.pdf</a>                             |
| Hodgkin and Non-Hodgkin Lymphoma Post-Infusion Data | 3      | <a href="https://www.cibmtr.org/DataManagement/DataCollectionForms/Documents/2118/Rev3.0/2118R3.0.pdf">https://www.cibmtr.org/DataManagement/DataCollectionForms/Documents/2118/Rev3.0/2118R3.0.pdf</a>                             |
| Hodgkin and Non-Hodgkin Lymphoma Post-Infusion Data | 2      | <a href="https://www.cibmtr.org/DataManagement/DataCollectionForms/Documents/2118/Rev2.0/Form2118_R2_Retired.pdf">https://www.cibmtr.org/DataManagement/DataCollectionForms/Documents/2118/Rev2.0/Form2118_R2_Retired.pdf</a>       |
| Hodgkin and Non-Hodgkin Lymphoma Post-Infusion Data | 1      | <a href="https://www.cibmtr.org/DataManagement/DataCollectionForms/Documents/2118/Rev1.0/combine_2118_LYM.pdf">https://www.cibmtr.org/DataManagement/DataCollectionForms/Documents/2118/Rev1.0/combine_2118_LYM.pdf</a>             |
| Recipient Death Data                                | Active | <a href="https://www.cibmtr.org/DataManagement/DataCollectionForms/Documents/2900/Rev4/2900R4.pdf">https://www.cibmtr.org/DataManagement/DataCollectionForms/Documents/2900/Rev4/2900R4.pdf</a>                                     |
| Recipient Death Data                                | 3      | <a href="https://www.cibmtr.org/DataManagement/DataCollectionForms/Documents/2900/Rev3.0/2900R3.0.pdf">https://www.cibmtr.org/DataManagement/DataCollectionForms/Documents/2900/Rev3.0/2900R3.0.pdf</a>                             |
| Recipient Death Data                                | 2      | <a href="https://www.cibmtr.org/DataManagement/DataCollectionForms/Documents/2900/Rev2.0/Form%202900%20R2%20(8).pdf">https://www.cibmtr.org/DataManagement/DataCollectionForms/Documents/2900/Rev2.0/Form%202900%20R2%20(8).pdf</a> |
| Recipient Death Data                                | 1      | <a href="https://www.cibmtr.org/DataManagement/DataCollectionForms/Documents/2900/Rev1.0/combine_2900_Death.pdf">https://www.cibmtr.org/DataManagement/DataCollectionForms/Documents/2900/Rev1.0/combine_2900_Death.pdf</a>         |
